# Supplementary material for: High-efficiency, stable and non-chemically doped graphene–Si solar cells through interface engineering and PMMA antireflection
Source: Royal Society of Chemistry journal article supplement (doi:10.1039/c5ra22418g), 2016-01-01
Supplement: c5ra22418g1.pdf [file c5ra22418g1.pdf]

**Support information**

**High-efficiency, stable and non-chemical-doped graphene-Si solar cells through interface engineering and PMMA antireflection**

Tianpeng Jiao,<sup>1,2</sup> Dapeng Wei,<sup>1,a)</sup> Xuefen Song,<sup>1</sup> Tai Sun,<sup>1</sup> Jun Yang,<sup>1</sup> Leyong Yu,<sup>1</sup>  
Yanhui Feng,<sup>2,b)</sup> Wentao Sun,<sup>3</sup> Wei Wei,<sup>4</sup> Haofei Shi,<sup>1</sup> Chenguo Hu,<sup>5</sup> and Chunlei  
Du<sup>1</sup>

<sup>1</sup>*Chongqing Key Laboratory of Multi-scale Manufacturing Technology, Chongqing Institute of Green and Intelligent Technology, Chinese Academy of Sciences, Chongqing, 400714, PR China*

<sup>2</sup>*School of Mechanical Engineering, University of Science and Technology Beijing, Beijing 100083, PR China*

<sup>3</sup>*Key Laboratory for the Physics Key laboratory for the Physics and Chemistry of Nanodevices & Department of Electronics, Peking University, Beijing 100871, PR China*

<sup>4</sup>*College of Optoelectronic Engineering, Chongqing University, Chongqing 400044, PR China*

<sup>5</sup>*Department of Applied Physics, Chongqing University, Chongqing 400044, PR China*

<sup>a)</sup> To whom correspondence should be addressed. E-mail: [dpwei@cigit.ac.cn](mailto:dpwei@cigit.ac.cn)

<sup>b)</sup> Electronic mail: [yhfeng@me.ustb.edu.cn](mailto:yhfeng@me.ustb.edu.cn)

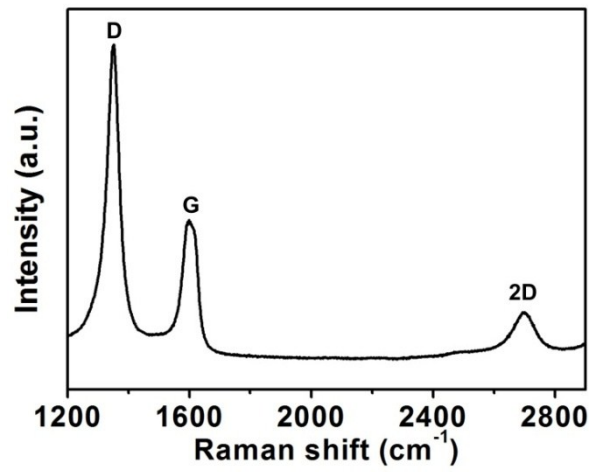

Figure S1. Raman spectra of the CNWs.

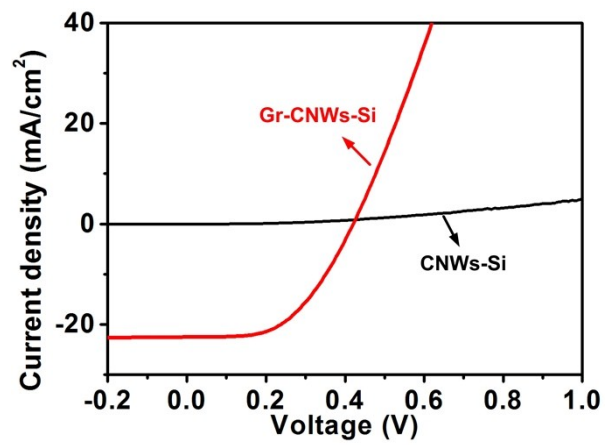

Figure S2. Light J-V curves for CNWs-Si (dark line) and Gr-CNWs-Si (red line) solar cells.

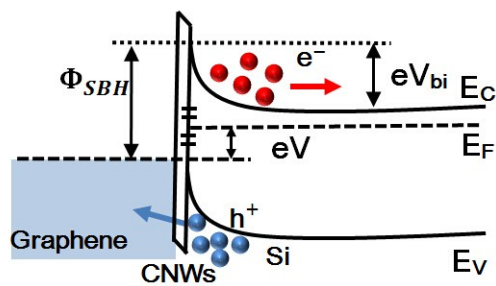

Figure S3. Energy band diagram of the Gr-CNWs-Si junction.  $\Phi_{SBH}$  is the barrier height,  $V_{bi}$  is the built-in potential,  $V$  is the applied voltage,  $E_F$  is the energy of Fermi level.

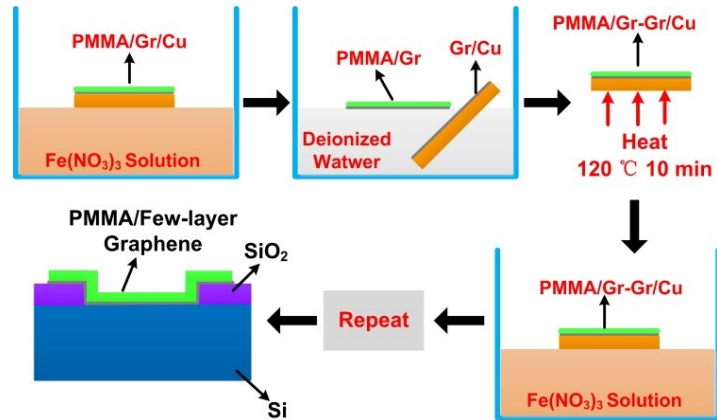

Figure S4. The layer-by-layer graphene transfer process for PMMA-few-layer Gr-Si solar cells.

Table S1. The performances of the PMMA-Gr-CNWs-Si solar cells with 1-4 layer graphene and the degraded efficiency under different days.

|           | $V_{OC}$ (V) | $J_{SC}$ (mA/cm <sup>2</sup> ) | FF (%) | PCE (%) |
|-----------|--------------|--------------------------------|--------|---------|
| Monolayer | 0.43         | 27.8                           | 63.0   | 7.5     |
| 2-layer   | 0.44         | 29.1                           | 69.8   | 8.9     |
| 3-layer   | 0.43         | 27.2                           | 70.1   | 8.2     |
| 4-layer   | 0.42         | 25.1                           | 71.8   | 7.6     |
| 30 days   | 0.43         | 28.9                           | 68.7   | 8.6     |
| 60 days   | 0.43         | 28.7                           | 67.7   | 8.4     |
| 90 days   | 0.43         | 28.4                           | 67.3   | 8.2     |
| 120 days  | 0.42         | 28.6                           | 66.8   | 8.0     |
